# Supplementary material
Source: MDPI journal article supplement (https://www.mdpi.com/2073-4441/14/17/2657)
Supplement: s1 [file s1]

**Table S1.** The ratio of ions to Na<sup>+</sup> and Ca<sup>2+</sup>, as well as the SO<sub>4</sub><sup>2-</sup>/NO<sub>3</sub><sup>-</sup> ratio in precipitation at the studied stations.

| Row                  | Station     | Cl <sup>-</sup> /Na <sup>+</sup> | Mg <sup>2+</sup> /Na <sup>+</sup> | K <sup>+</sup> /Na <sup>+</sup> | SO <sub>4</sub> <sup>2-</sup> /Na <sup>+</sup> | Ca <sup>2+</sup> /Na <sup>+</sup> | Cl <sup>-</sup> /Ca <sup>2+</sup> | Mg <sup>2+</sup> /Ca <sup>2+</sup> | K <sup>+</sup> /Ca <sup>2+</sup> | SO <sub>4</sub> <sup>2-</sup> /Ca <sup>2+</sup> | Na <sup>+</sup> /Ca <sup>2+</sup> | SO <sub>4</sub> <sup>2-</sup> /NO <sub>3</sub> <sup>-</sup> |
|----------------------|-------------|----------------------------------|-----------------------------------|---------------------------------|------------------------------------------------|-----------------------------------|-----------------------------------|------------------------------------|----------------------------------|-------------------------------------------------|-----------------------------------|-------------------------------------------------------------|
| Continental stations |             |                                  |                                   |                                 |                                                |                                   |                                   |                                    |                                  |                                                 |                                   |                                                             |
| 1                    | Shiraz      | 1.76                             | 0.35                              | 0.59                            | 4.90                                           | 4.34                              | 0.40                              | 0.08                               | 0.13                             | 1.13                                            | 0.23                              | –                                                           |
| 2                    | Ahvaz       | 1.84                             | 0.10                              | –                               | 4.33                                           | 1.99                              | 0.92                              | 0.05                               | 0.15                             | 2.17                                            | 0.50                              | –                                                           |
| 3                    | Shahrud     | 1.03                             | 0.18                              | 0.36                            | 2.95                                           | 2.81                              | 0.37                              | 0.06                               | 0.13                             | 1.05                                            | 0.36                              | –                                                           |
| 4                    | Haraz       | 1.16                             | 0.27                              | 0.58                            | 2.60                                           | 6.61                              | 0.18                              | 0.04                               | 0.09                             | 0.40                                            | 0.15                              | 0.99                                                        |
| 5                    | Sarcheshmeh | 2.77                             | 0.23                              | 5.77                            | 12.23                                          | 3.54                              | 0.79                              | 0.07                               | 1.65                             | 3.47                                            | 0.28                              | 21.77                                                       |
| 6                    | Tehran      | 0.88                             | 0.77                              | 0.40                            | 4.38                                           | 3.38                              | 0.26                              | 0.23                               | 0.16                             | 1.29                                            | 0.29                              | 1.94                                                        |
| 7                    | Mashhad     | 1.18                             | 0.06                              | 0.03                            | 1.09                                           | 0.58                              | 2.05                              | 0.11                               | 0.05                             | 1.88                                            | 1.73                              | –                                                           |
| 8                    | Arak        | 0.23                             | 0.51                              | 0.05                            | 2.25                                           | 1.35                              | 0.17                              | 0.38                               | 0.04                             | 1.66                                            | 0.74                              | –                                                           |
| 9                    | Urmia       | –                                | –                                 | –                               | –                                              | –                                 | –                                 | –                                  | –                                | –                                               | –                                 | 0.72                                                        |
| 10                   | Riyadh      | 1.56                             | 0.25                              | 0.30                            | 2.84                                           | 5.16                              | 0.30                              | 0.05                               | 0.06                             | 0.55                                            | 0.19                              | –                                                           |
| 11                   | Eshidiya    | 1.52                             | 0.52                              | 0.51                            | 2.40                                           | 0.42                              | 3.62                              | 1.25                               | 1.25                             | 5.75                                            | 2.37                              | 11.99                                                       |
| 12                   | Ankara      | 4.25                             | 0.24                              | 0.45                            | 9.86                                           | 4.34                              | 0.98                              | 0.05                               | 0.10                             | 2.27                                            | 0.23                              | 0.88                                                        |
| 13                   | Faryab      | 1.12                             | 0.32                              | 0.48                            | 2.2                                            | 2.84                              | 0.39                              | 0.11                               | 0.17                             | 0.77                                            | 0.35                              | 1.57                                                        |
| 14                   | Hadath      | 2.73                             | 0.56                              | 0.30                            | 0.15                                           | 1.22                              | 2.23                              | 0.46                               | 0.25                             | 0.12                                            | 0.82                              | 0.37                                                        |
| 15                   | Nabatieh    | 2.67                             | 0.30                              | 0.30                            | 0.32                                           | 1.23                              | 2.17                              | 0.25                               | 0.25                             | 0.26                                            | 0.82                              | 0.38                                                        |
| 16                   | Palmyra     | 2.47                             | 1.85                              | 0.38                            | 6.63                                           | 13.58                             | 0.18                              | 0.14                               | 0.03                             | 0.50                                            | 0.08                              | 1.39                                                        |
| 17                   | Damascus    | 2.78                             | 1.23                              | 0.31                            | 12.19                                          | 14.20                             | 0.20                              | 0.09                               | 0.02                             | 0.86                                            | 0.07                              | 2.39                                                        |
| 18                   | Amman       | 0.40                             | 0.07                              | 0.06                            | 0.36                                           | 0.40                              | 1.02                              | 0.18                               | 0.16                             | 0.93                                            | 2.55                              | 1.88                                                        |
| 19                   | Baghdad     | 4.60                             | 1.47                              | 0.47                            | 9.11                                           | 3.19                              | 1.43                              | 0.46                               | 0.15                             | 2.85                                            | 0.31                              | –                                                           |
| 20                   | Ramallah    | –                                | –                                 | 0.45                            | –                                              | –                                 | –                                 | –                                  | –                                | –                                               | –                                 | –                                                           |
| Coastal stations     |             |                                  |                                   |                                 |                                                |                                   |                                   |                                    |                                  |                                                 |                                   |                                                             |
| 21                   | Jerdab      | –                                | –                                 | –                               | –                                              | 1.04                              | –                                 | –                                  | –                                | –                                               | –                                 | –                                                           |
| 22                   | Tartus      | 1.73                             | 0.35                              | 0.14                            | 0.64                                           | 4.45                              | 1.66                              | 0.33                               | 0.13                             | 0.62                                            | 0.96                              | 0.65                                                        |
| 23                   | Dhahran     | 1.70                             | 0.36                              | 0.13                            | 3.74                                           | 3.10                              | 0.55                              | 0.12                               | 0.04                             | 1.20                                            | 0.32                              | 1.26                                                        |
| 24                   | Istanbul    | 4.11                             | 1.74                              | 1.60                            | 5.56                                           | 4.25                              | 0.96                              | 0.40                               | 0.37                             | 1.31                                            | 0.24                              | –                                                           |
| 25                   | Tripoli     | 7.45                             | 2.80                              | 3.85                            | 1.19                                           | 19.93                             | 1.95                              | 0.61                               | 0.40                             | 0.38                                            | 0.88                              | 2.79                                                        |
| 26                   | Damietta    | –                                | –                                 | –                               | –                                              | –                                 | –                                 | –                                  | –                                | –                                               | –                                 | 1.39                                                        |
| 27                   | Karachi     | 0.77                             | 0.11                              | 0.46                            | 1.71                                           | 0.60                              | 1.28                              | 0.18                               | 0.78                             | 2.85                                            | 1.65                              | –                                                           |
| 28                   | Mahshahr    | 0.78                             | 0.26                              | 0.03                            | 2.49                                           | 0.58                              | 1.36                              | 0.45                               | 0.04                             | 4.31                                            | 1.73                              | 13.46                                                       |
